# Supplementary material for: ESAT-6–dependent cytosolic pattern recognition drives noncognate tuberculosis control in vivo
Source: JCI journal article supplement (doi:10.1172/jci84978), 2016-04-24
Supplement: sd1 [file 1]

## **SUPPLEMENTAL INFORMATION**

### **ESAT-6-dependent cytosolic pattern recognition drives noncognate tuberculosis control *in vivo***

Andreas Kupz, Ulrike Zedler, Manuela Stäber, Carolina Perdomo, Anca Dorhoi, Roland Brosch, Stefan H. E. Kaufmann

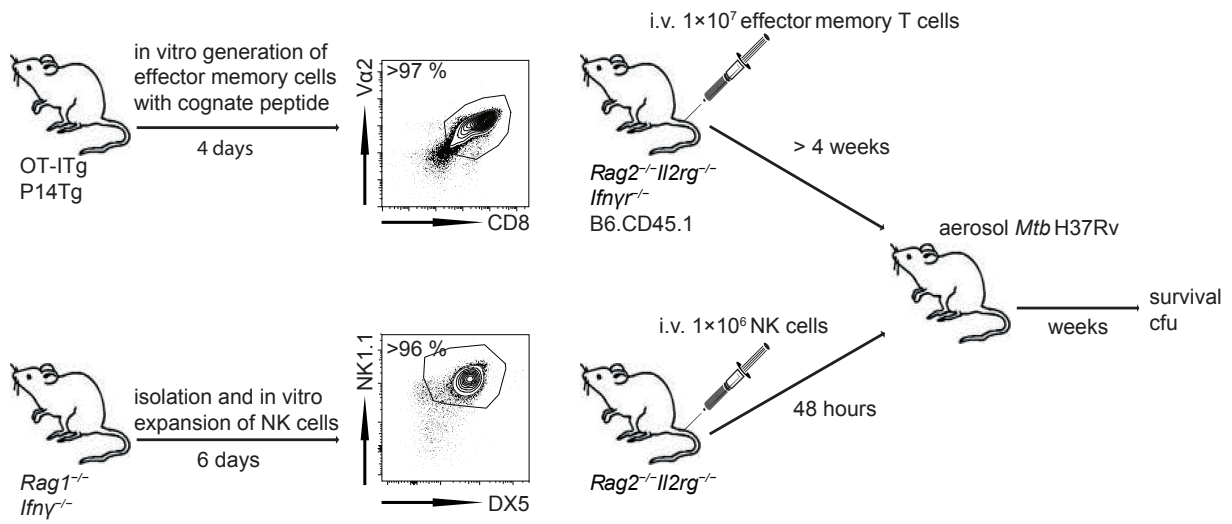

**Supplemental Figure 1: Generation and expansion of memory CD8<sup>+</sup> T cells and NK cells (Related to Figure 1).** TCR transgenic effector memory OT-ITg and P14Tg CD8<sup>+</sup> T cells were generated through in vitro activation of splenocytes with the cognate peptides SIINFEKL or KAVYNFATC, respectively. After 4 days cells were purified and  $1 \times 10^7$  Tg cells were transferred i.v. into naïve *Rag2<sup>-/-</sup>Il2rg<sup>-/-</sup>, Ifnyr<sup>-/-</sup>* or B6 (CD45.1<sup>+</sup>) mice. Mice were left untouched for at least 4 weeks to ensure that transferred Tg cells converted into central memory CD8<sup>+</sup> T cells. For NK cell transfers,  $1 \times 10^6$  purified and in vitro expanded NK cells from *Rag1<sup>-/-</sup>* or *Ifnyr<sup>-/-</sup>* donors were injected i.v. into naïve *Rag2<sup>-/-</sup>Il2rg<sup>-/-</sup>* mice on day 5 and 6 after in vitro culture. Mice were infected 48 hours after NK cell transfer. Representative FACS plots are shown.

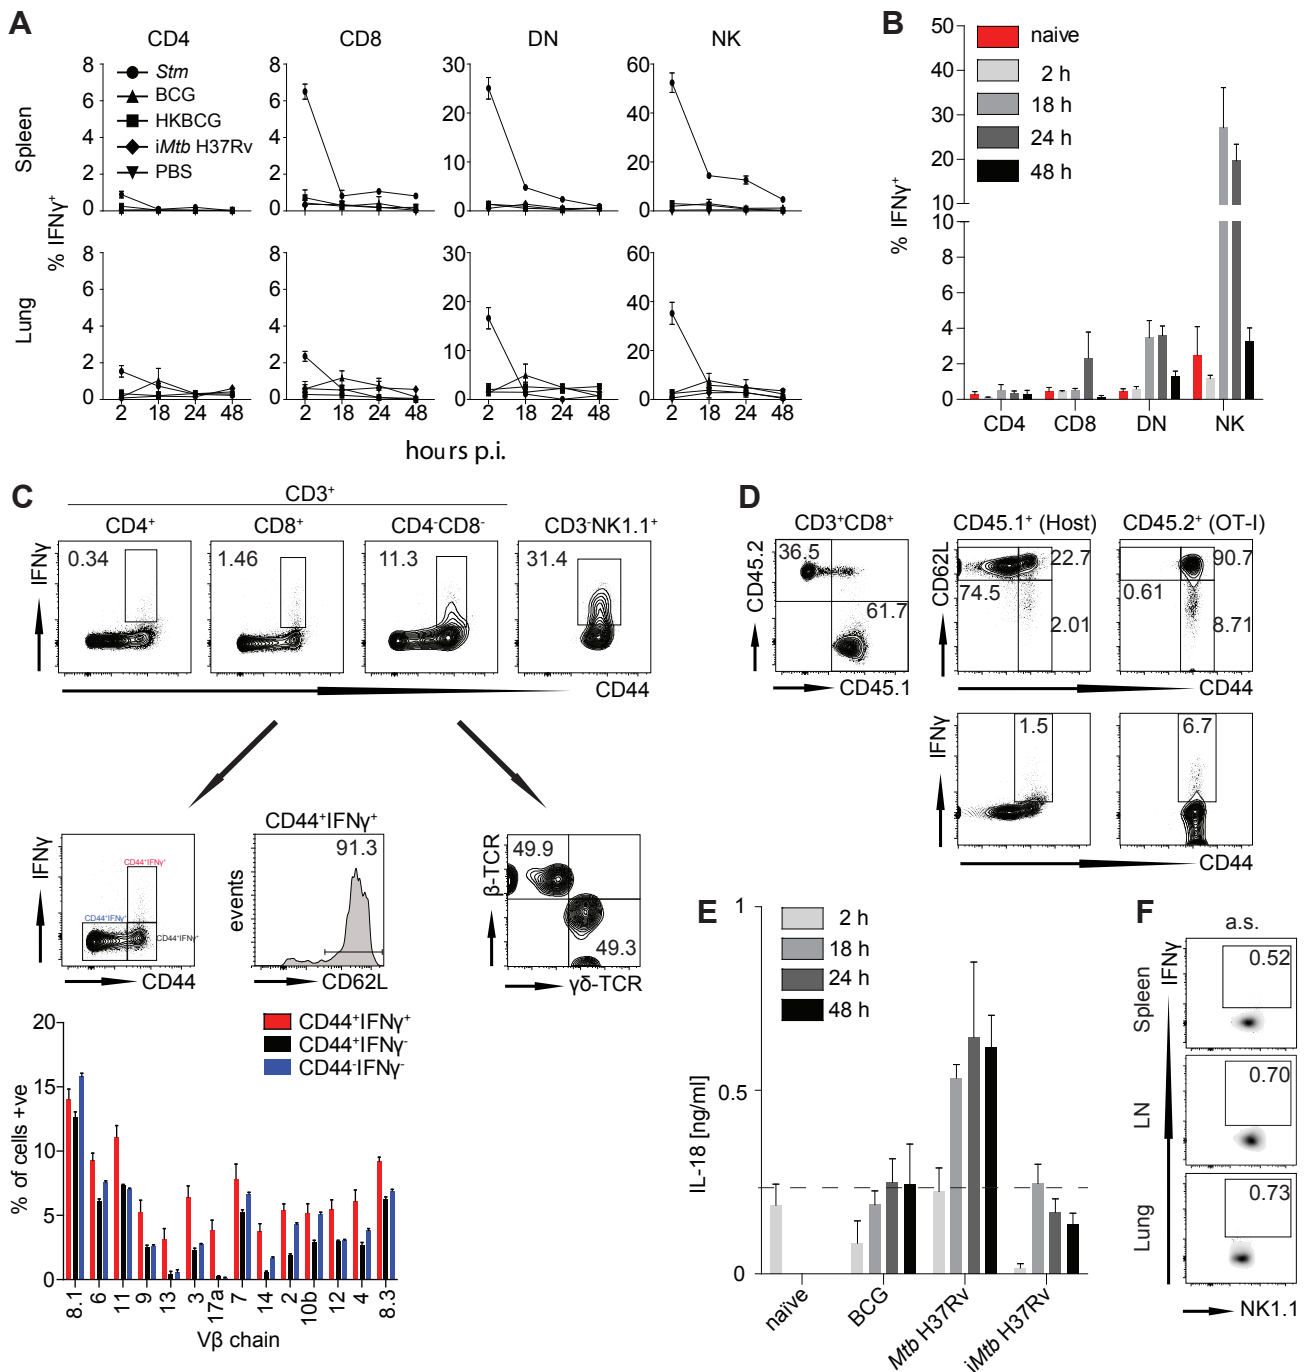

**Supplemental Figure 2: Temporal and spatial characterization of innate IFN- $\gamma$  secretion in response to *Mtb* (Related to Figure 2).** (A) Percent of IFN- $\gamma$ <sup>+</sup> cells amongst total viable splenic and lung CD3<sup>+</sup>CD8<sup>+</sup>, CD3<sup>+</sup>CD4<sup>+</sup>, CD3<sup>+</sup>CD4<sup>-</sup>CD8<sup>-</sup> T cells and CD3<sup>-</sup>NK1.1<sup>+</sup> cells at different time-points after injection of B6 mice with  $1 \times 10^8$  cfu of *S. Typhimurium* (*Stm*), BCG, heat-killed BCG (HKBCG), irradiated *Mtb* H37Rv (*iMtb*) or PBS. (B) Percent of IFN- $\gamma$ <sup>+</sup> cells amongst total viable CD3<sup>+</sup>CD8<sup>+</sup>, CD3<sup>+</sup>CD4<sup>+</sup>, CD3<sup>+</sup>CD4<sup>-</sup>CD8<sup>-</sup> T cells and CD3<sup>-</sup>NK1.1<sup>+</sup> cells in the lung at different time-points after injection of B6 mice with  $1 \times 10^8$  cfu *Mtb* H37Rv. (C) Representative FACS plots and histograms of splenic CD3<sup>+</sup>CD8<sup>+</sup>, CD3<sup>+</sup>CD4<sup>+</sup>, CD3<sup>+</sup>CD4<sup>-</sup>CD8<sup>-</sup> T cells and CD3<sup>-</sup>NK1.1<sup>+</sup> cells at 24 hours after B6 mice were injected with  $1 \times 10^8$  cfu *Mtb* H37Rv. (D) Representative FACS plots of endogenous (CD45.1<sup>+</sup>) and exogenous (CD45.2<sup>+</sup>, OT-I) splenic CD3<sup>+</sup>CD8<sup>+</sup> cells at 24 hours after B6 mice were injected with  $1 \times 10^8$  cfu *Mtb* H37Rv. (E) Serum IL-18 concentrations at different time-points after i.t. delivery of B6 mice with  $1 \times 10^8$  cfu BCG, *Mtb* H37Rv, irradiated *Mtb* H37Rv or PBS. (F) Percent of IFN- $\gamma$ <sup>+</sup> CD3<sup>-</sup>NK1.1<sup>+</sup> cells from either spleen, lung or draining lymph nodes 24 hours after infection with  $1 \times 10^3$  cfu *Mtb* H37Rv via aerosol (a.s.) route. Results are presented as pooled data means  $\pm$  SEM (A – D) and representative FACS plots (C, E) of 4–9 (A), 5–10 (B), 4 (C), 3 (D), 5–7 (E) and 10 (F) mice per group from at least 2 pooled independent experiments.

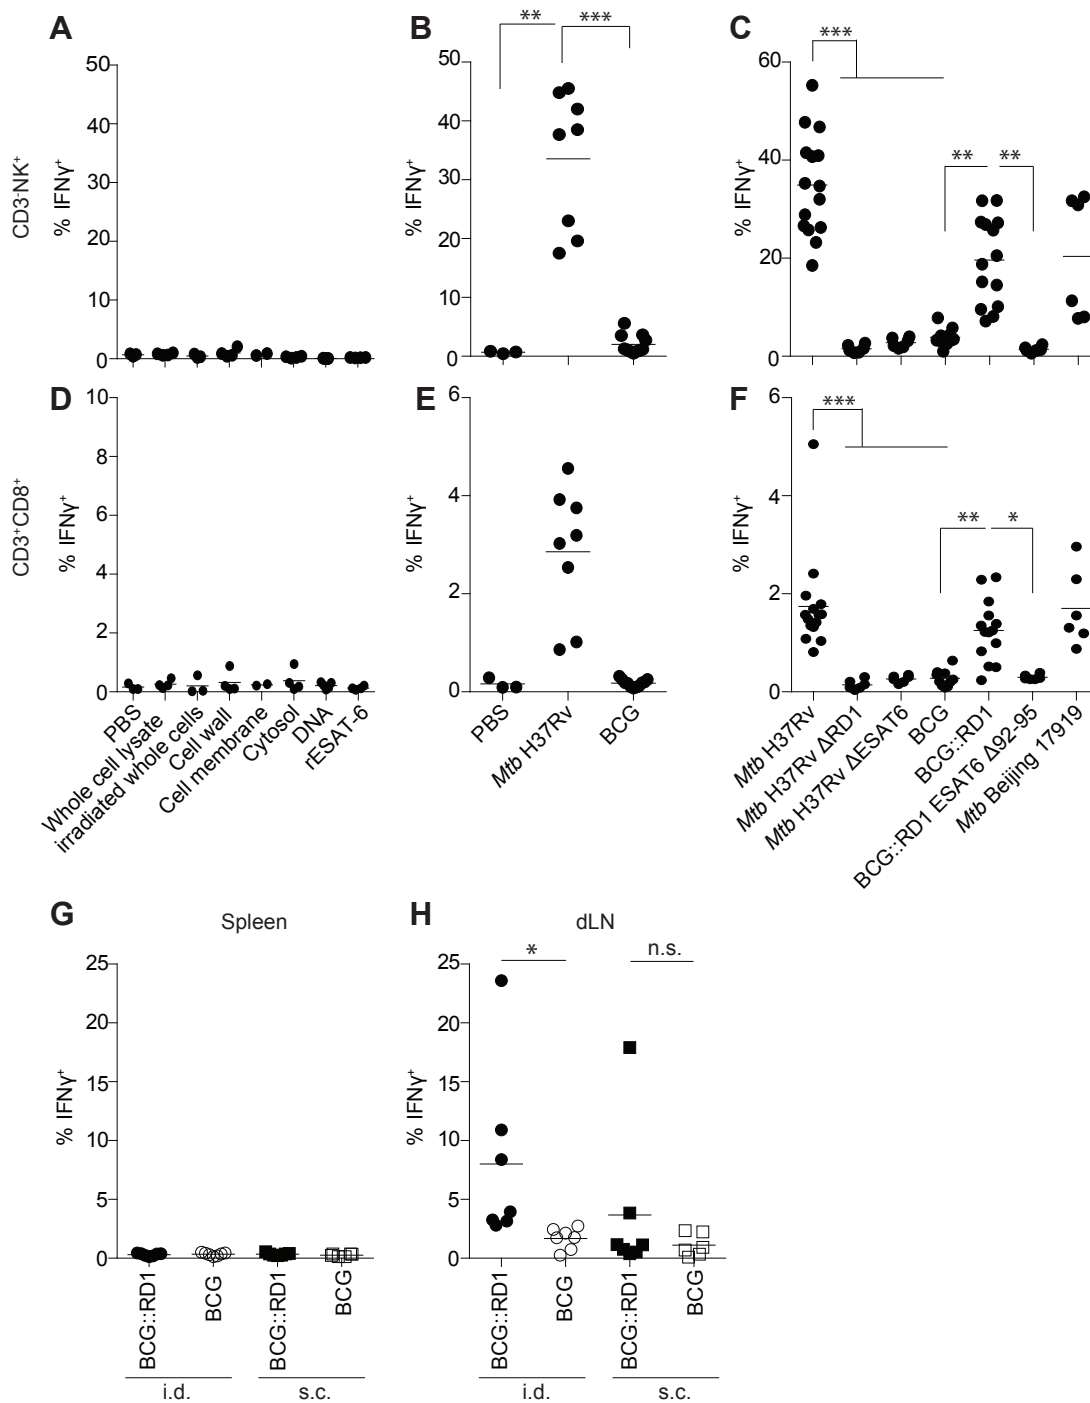

**Supplemental Figure 3: RD1-dependence is not organ specific (Related to Figure 3).** (A–C) Percent of viable IFN- $\gamma$ <sup>+</sup> cells amongst total viable splenic CD3-NK1.1<sup>+</sup> (A–C) and CD3<sup>+</sup>CD8<sup>+</sup> (D–F) cells 24 hours after i.v. injection of purified mycobacterial ligands (A, D) or  $1 \times 10^8$  cfu wildtype or recombinant *Mtb* or BCG strains (B, C, E, F). (G, H) Percent of viable IFN- $\gamma$ <sup>+</sup> cells amongst total viable CD3-NK1.1<sup>+</sup> cells from spleen (G) or draining lymph node (H) 24 hours after i.d. or s.c. injection of  $1 \times 10^8$  cfu BCG or BCG::RD1. Results are presented as individual data points of 3-15 mice per group from at least 2 pooled independent experiments. Statistical analyses: One-way ANOVA; significant differences are indicated by asterisks: \*  $p < 0.05$ ; \*\*  $p < 0.01$ ; \*\*\*  $p < 0.001$ ; n.s. not significant.

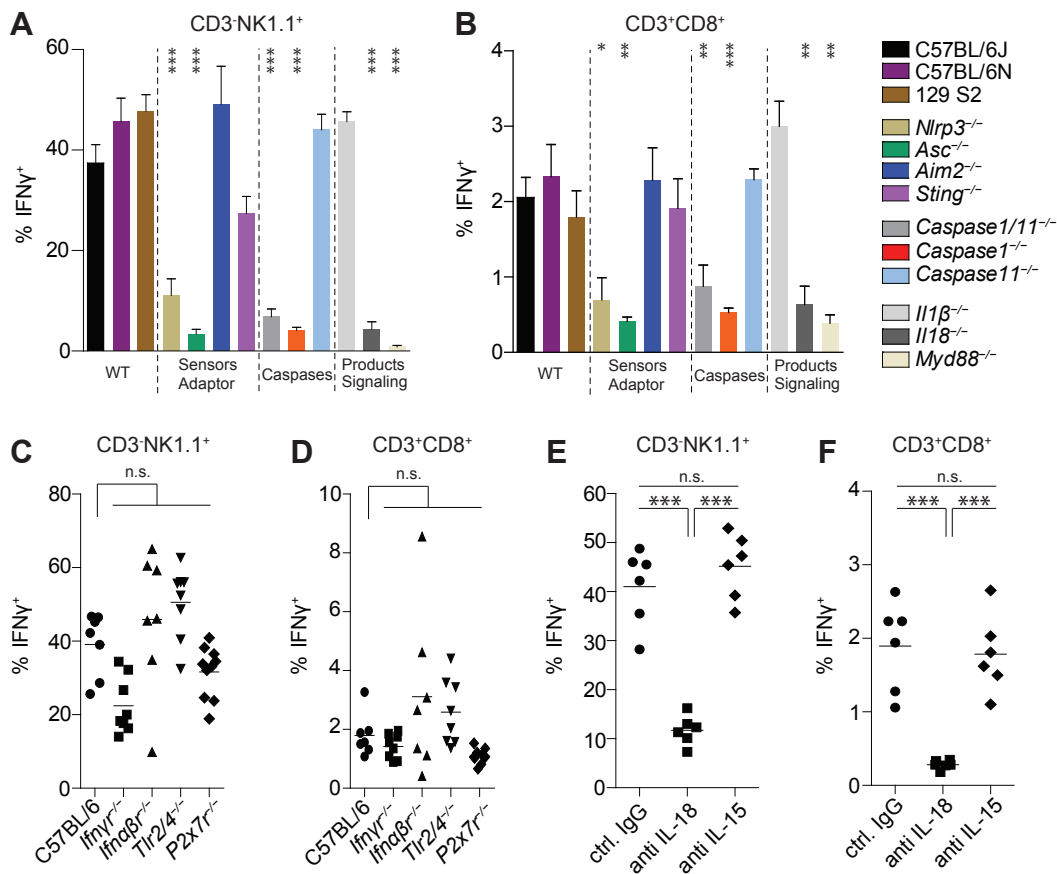

**Supplemental Figure 4: Rapid IFN- $\gamma$  production by NK cells and *Mtb*-unrelated memory CD8<sup>+</sup> T cells requires NLRP3-dependent IL-18 secretion (Related to Figure 4).** (A–D) Percent of viable IFN- $\gamma$ <sup>+</sup> cells amongst total viable splenic CD3-NK1.1<sup>+</sup> (A, C) and CD3<sup>+</sup>CD8<sup>+</sup> (B, D) cells 24 h after i.v. injection of  $1 \times 10^8$  cfu *Mtb* H37Rv into different mouse strains lacking key components of the cytosolic PRR pathways (A, B), key surface receptors involved in *Mtb* recognition and innate immune responses (C, D) or B6 mice treated with different antibodies (E, F). Results are presented as individual data points (C - F) or pooled data means plus standard error of the mean (A, B) of 5–16 (A, B), 7–10 (C, D) or 6 (E, F) mice per group from at least two pooled independent experiments. Statistical analyses: One-way ANOVA; significant differences relative to B6 controls (A, D) are indicated by asterisks: \*  $p < 0.05$ ; \*\*  $p < 0.01$ ; \*\*\*  $p < 0.001$ ; n.s. not significant.

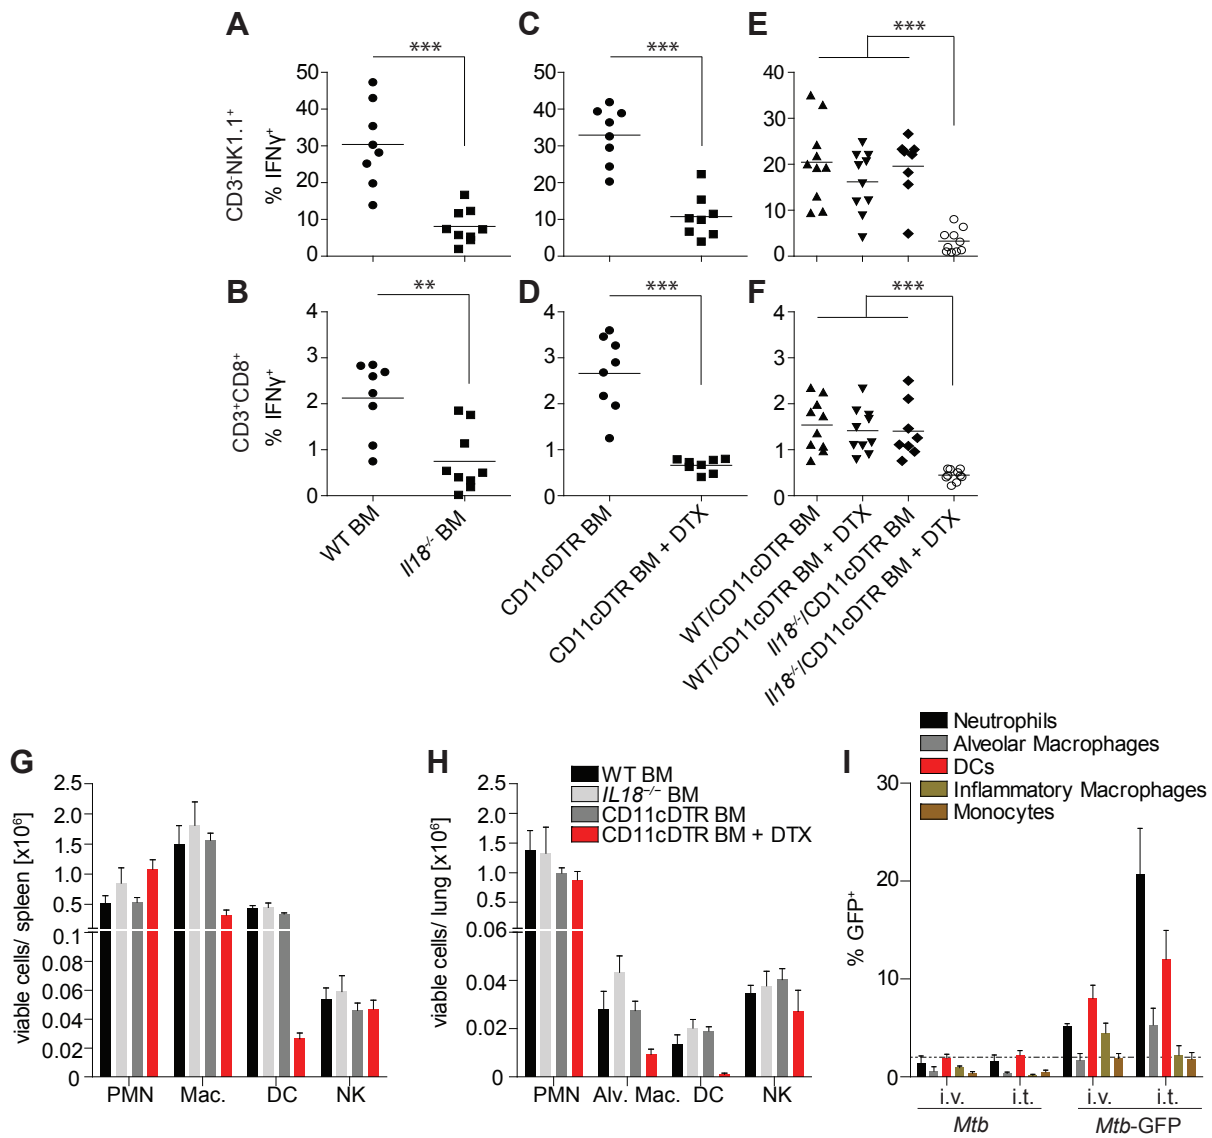

**Supplemental Figure 5: CD11c<sup>+</sup> cells are involved in early uptake of *Mtb* (Related to Figure 5).** (A–F) Percent of IFN- $\gamma$ <sup>+</sup> cells amongst total splenic CD3<sup>+</sup>NK1.1<sup>+</sup> (A, C, E) and CD3<sup>+</sup>CD8<sup>+</sup> (B, D, F) cells of straight WT or *Il18*<sup>-/-</sup> (A, B) and CD11cDTR bone marrow chimeras (C, D) as well as DTX- and PBS-treated CD11cDTR mixed bone marrow chimeras (E, F) 24 hours after injection of  $1 \times 10^8$  cfu *Mtb* H37Rv. (G, H) Number of viable PMNs, macrophages, DCs and NK cells per spleen (G) and lung (H) 24 hours after i.v. injection with  $1 \times 10^8$  cfu *Mtb* H37Rv of WT, *Il18*<sup>-/-</sup> and DTX- or PBS-treated CD11cDTR bone marrow chimeras 6 weeks after bone marrow transplantation. (I) Uptake of *Mtb* H37Rv-GFP by individual lung myeloid cell populations 24 hours after i.v or i.t. delivery of  $1 \times 10^8$  cfu. Results are presented as individual data points (A–F) or pooled data means plus standard error of the mean (G–I) of 8–10 (A–H) or 6 (I) mice per group from 2 (I) or 3 (A–H) pooled independent experiments. Statistical analyses: One-way ANOVA; significant differences are indicated by asterisks: \* p<0.05; \*\* p<0.01; \*\*\* p<0.001.
